# Supplementary material for: An all-in-one nanomaterial derived from rGO-MoS2 for photo/chemotherapy of tuberculosis
Source: Royal Society of Chemistry journal article supplement (doi:10.1039/d1nj03549e), 2022-01-01
Supplement: d1nj03549e1.pdf [file d1nj03549e1.pdf]

**Supplementary details**  
**All-in-one nanomaterial derived from rGO-MoS<sub>2</sub> with photo/chemotherapy for tuberculosis**

Sivaraj Mehnath<sup>1</sup>., Karuppanan Chitra<sup>2</sup>., Murugaraj Jeyaraj<sup>1\*</sup>

*<sup>1</sup>National Centre for Nanoscience and Nanotechnology, University of Madras,  
Guindy Campus, Chennai-25, Tamil Nadu, India.*

*<sup>2</sup>Translational Research Platform for Veterinary Biological, Madhavaram Milk Colony,  
Chennai-51, Tamil Nadu, India.*

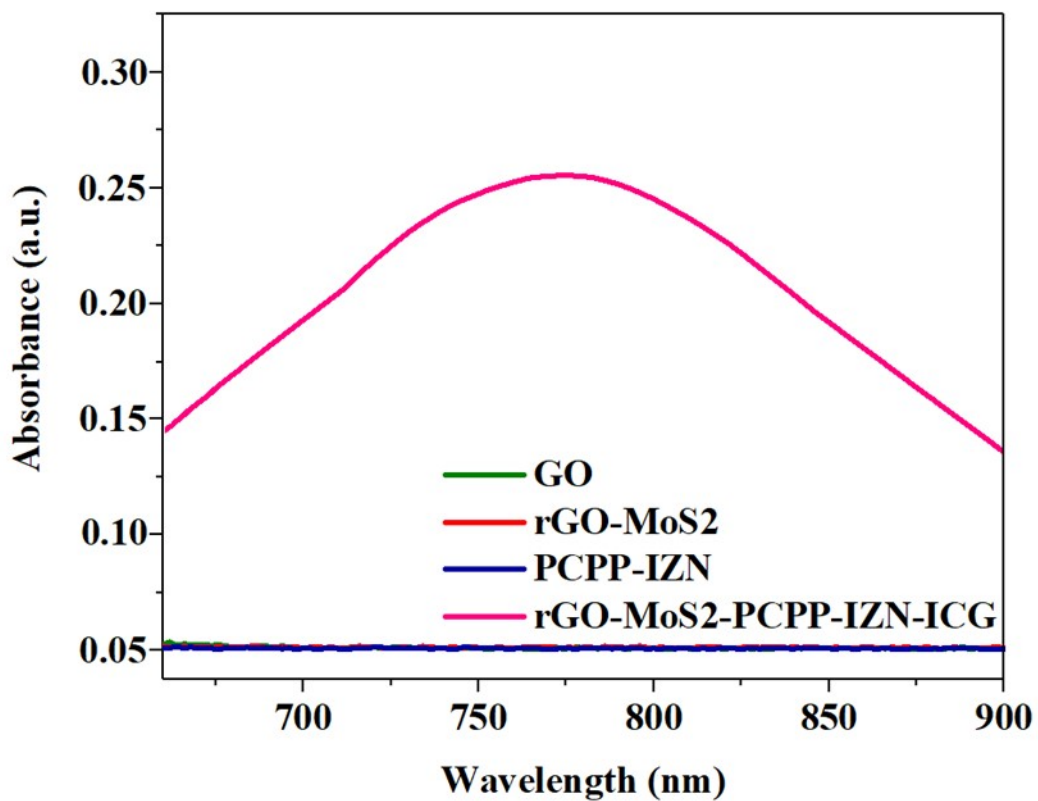

Figure.S1. The UV-Vis spectra of GO, rGO-MoS<sub>2</sub>, PCPP-IZN, and rGO-MoS<sub>2</sub>-PCPP-IZN-ICG

**Table. S1. ICG loading efficiency**

| <b>Sample</b>      | <b>rGO</b>         | <b>rGO-MoS<sub>2</sub></b> | <b>rGO-MoS<sub>2</sub> -PCPP-IZN</b> |
|--------------------|--------------------|----------------------------|--------------------------------------|
| <b>ICG loading</b> | <b>81.3 ± 0.28</b> | <b>84.53±0.43</b>          | <b>93.34±0.26</b>                    |

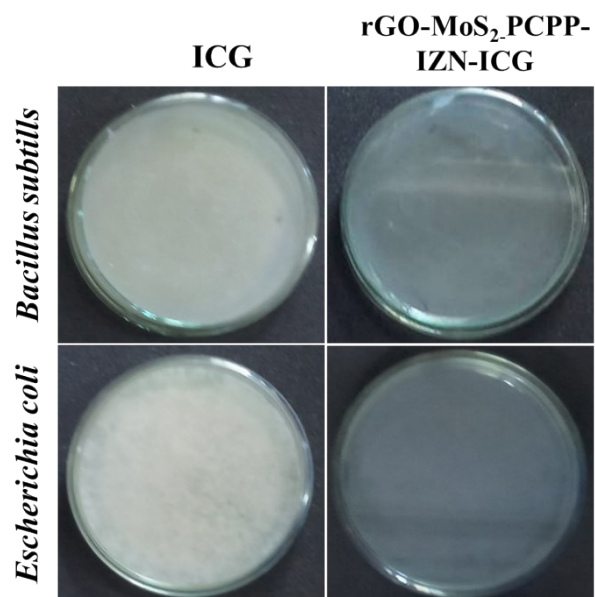

**Figure.S2. PCPP-IZN, ICG, rGO, rGO-MoS<sub>2</sub>, rGO-MoS<sub>2</sub>-PCPP-IZN-ICG nanomaterial effect on *E.coli* and *B.subtilis* bacterial inhibition after NIR-irradiation by pour plate method.**

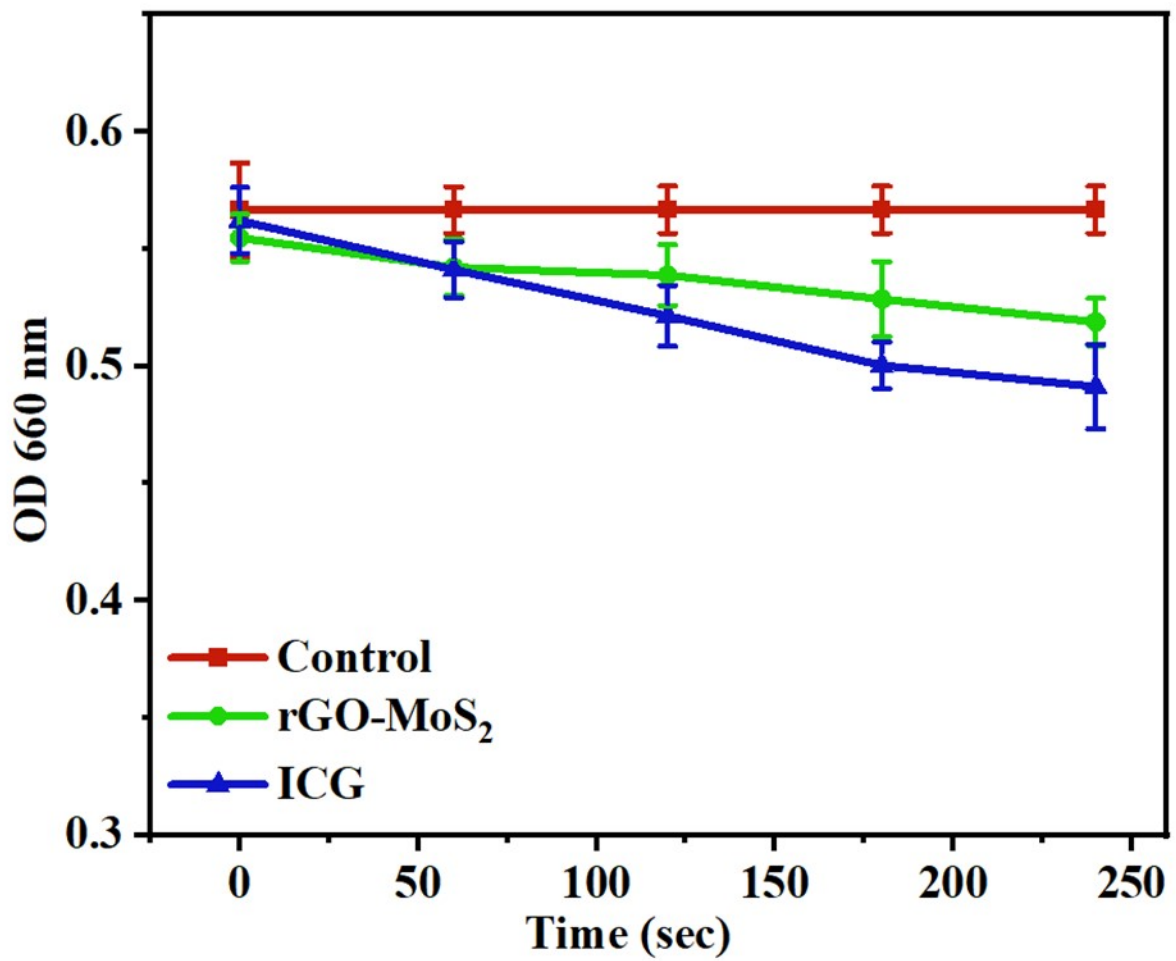

Figure.S3. *Mycobacterium tuberculosis* growth inhibitory effect of control (only NIR laser irradiation), rGO-MoS<sub>2</sub> (5 mg/mL), and ICG (5 mg/mL) in different time interval of NIR laser irradiation.

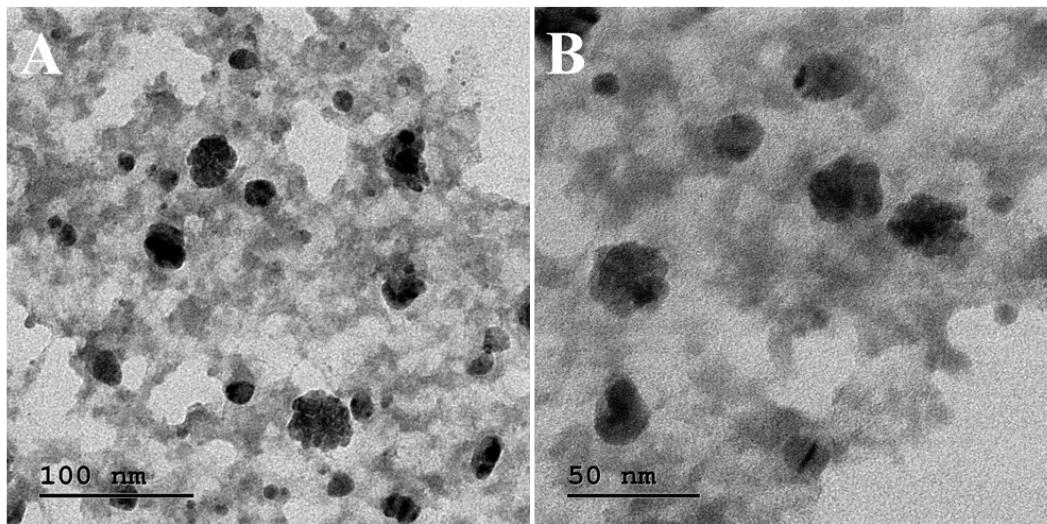

**Figure.S4. rGO-MoS<sub>2</sub>-PCPP-IZN-ICG nanomaterial treated with cells and NIR irradiation for 5 min.**
